# Supplementary material for: Diversity patterns of soil microbial communities in the Sophora flavescens rhizosphere in response to continuous monocropping
Source: PubMed Central journal article supplement (PMC7457492; doi:10.1186/s12866-020-01956-8), 2020-08-31

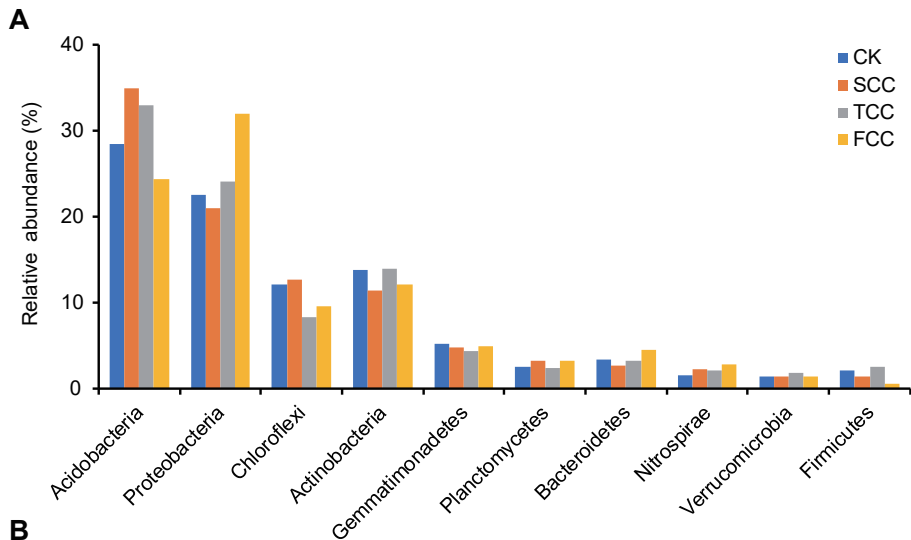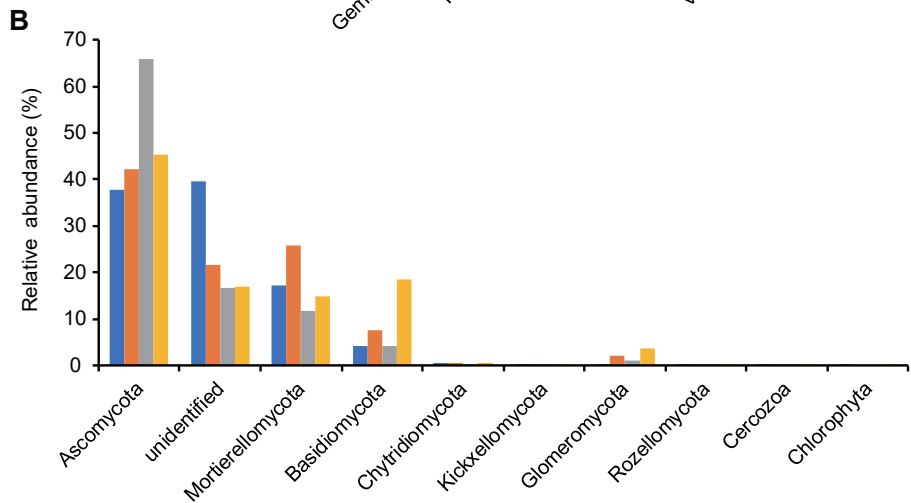

Supplement: 12866_2020_1956_MOESM1_ESM.pdf [file 12866_2020_1956_MOESM1_ESM.pdf]
