# Supplementary material for: Diversity patterns of soil microbial communities in the Sophora flavescens rhizosphere in response to continuous monocropping
Source: PubMed Central journal article supplement (PMC7457492; doi:10.1186/s12866-020-01956-8), 2020-08-31
Supplement: 12866_2020_1956_MOESM2_ESM.pdf [file 12866_2020_1956_MOESM2_ESM.pdf]

**A**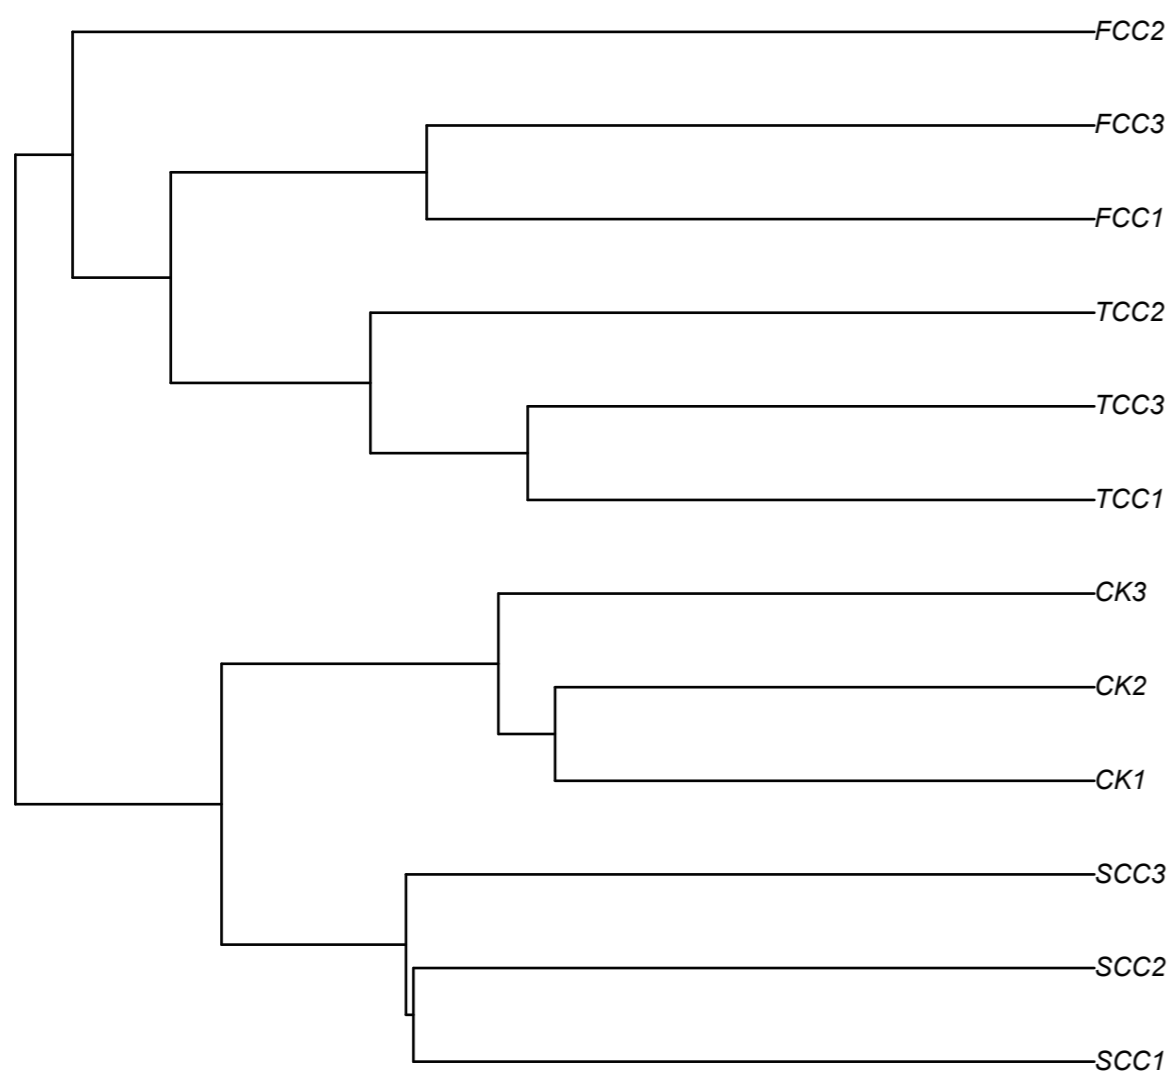**B**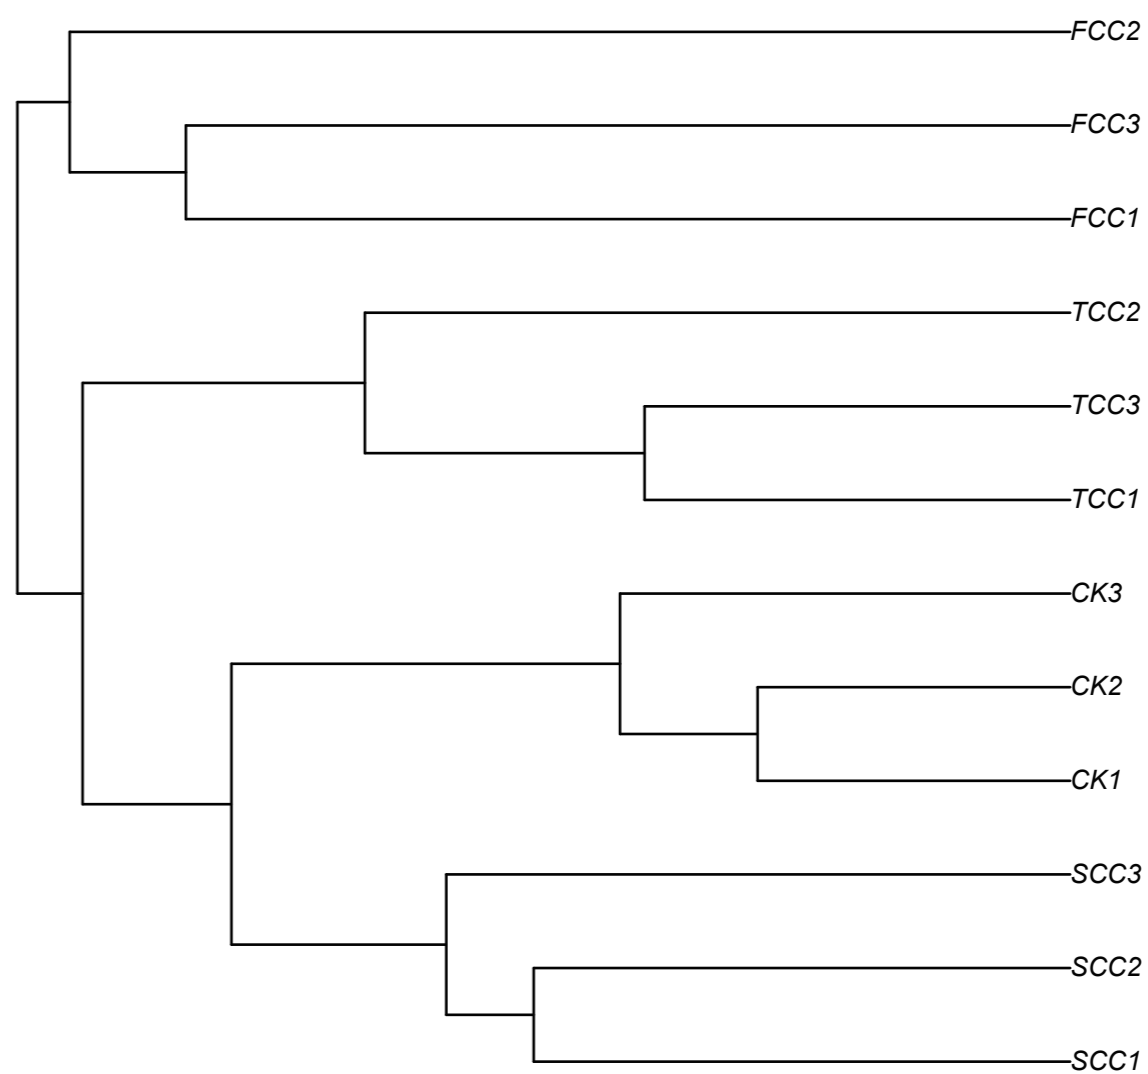**C**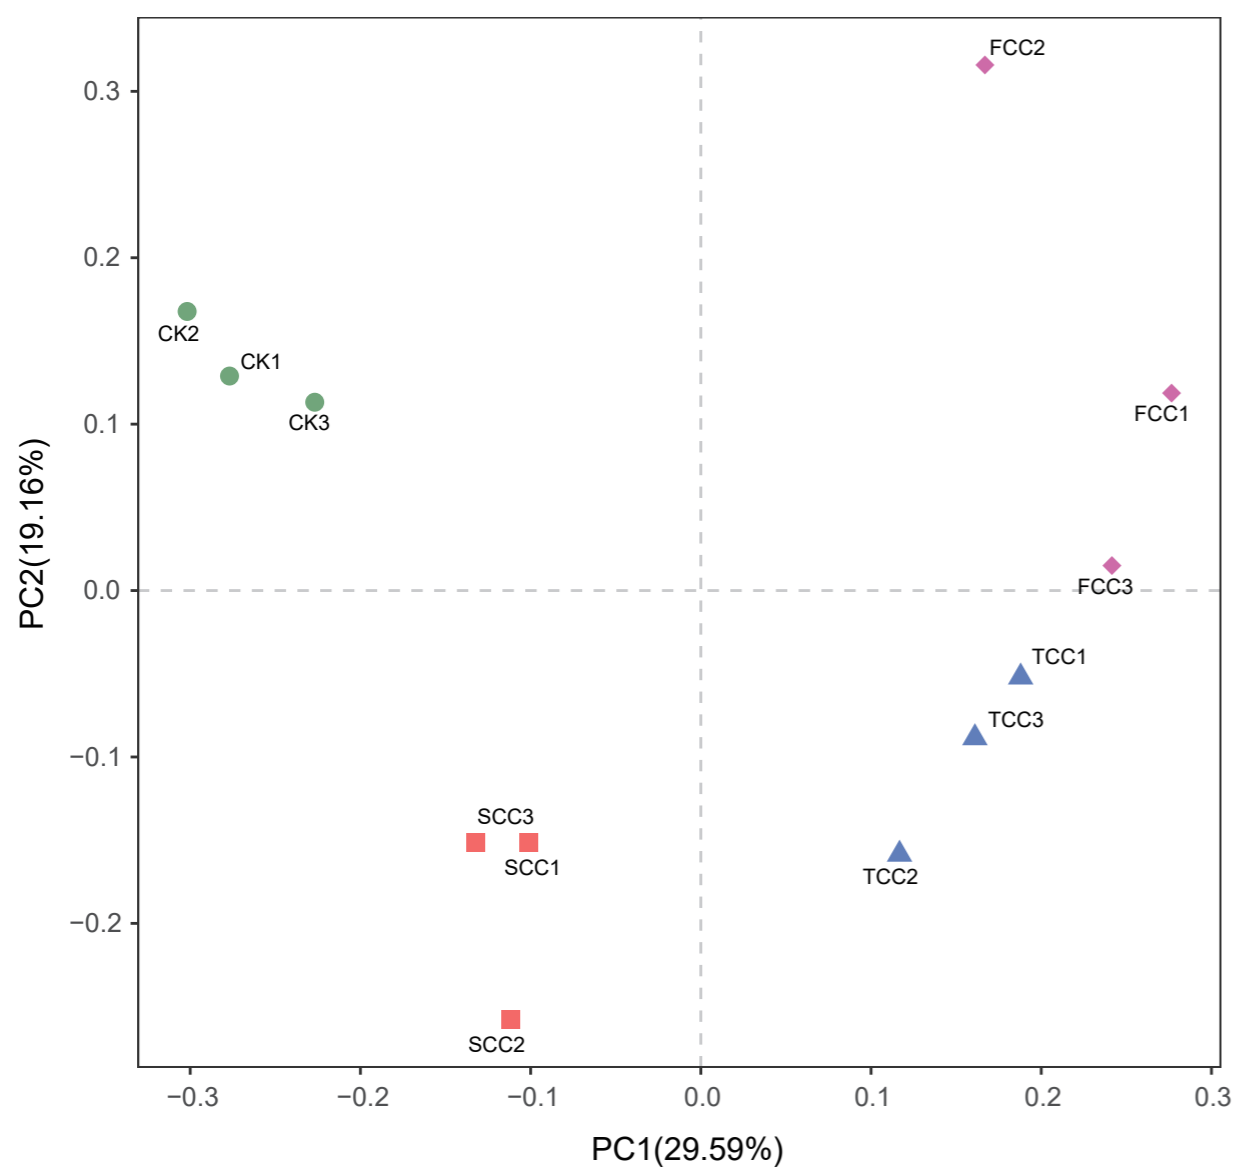**D**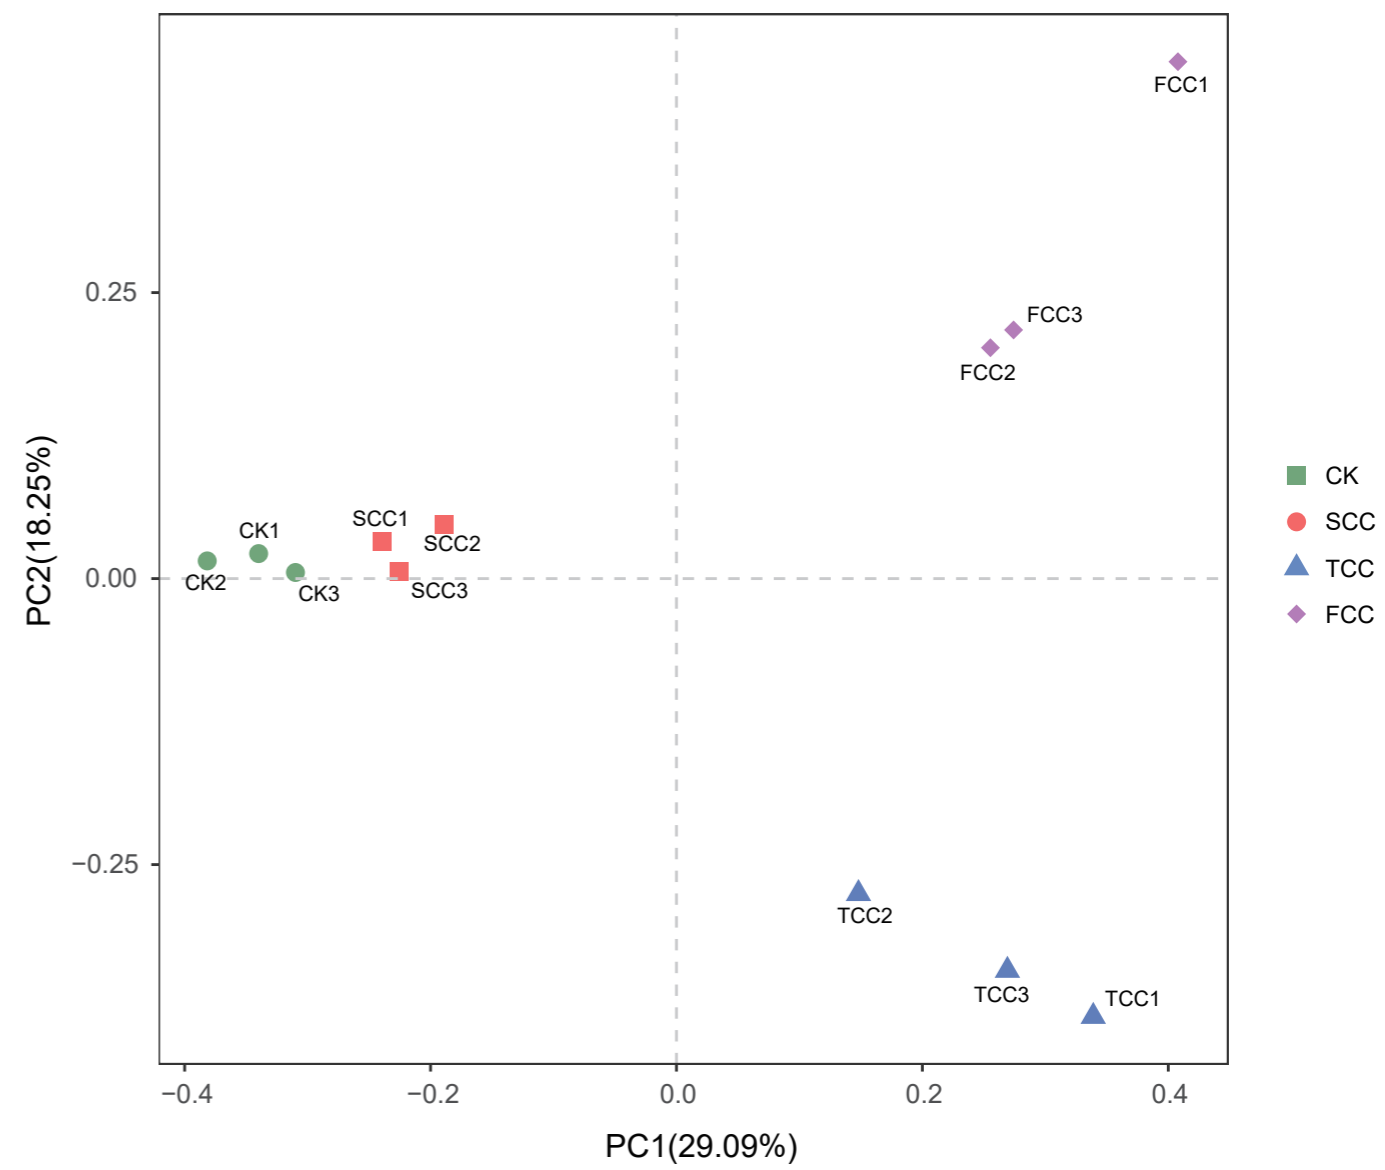

■ CK  
■ SCC  
▲ TCC  
◆ FCC
